# Supplementary material
Source: PubMed Central journal article supplement (PMC3528074)
Supplement: NIHMS365053-supplement-Supporting_Information.pdf [file NIHMS365053-supplement-Supporting_Information.pdf]

Supporting Information

© Wiley-VCH 2012

69451 Weinheim, Germany

**Direct Fluorescence Monitoring of DNA Base Excision Repair\*\***

*Toshikazu Ono, Shenliang Wang, Chi-Kin Koo, Lisa Engstrom, Sheila S. David, and Eric T. Kool\**

anie\_201108135\_sm\_miscellaneous\_information.pdf

**Materials and reagents.** The nucleoside phosphoramidites (A, U, T, S) and 3'-phosphate CPG column were purchased from Glen Research. Solvents and reagents were purchased from Fisher Scientific, Aldrich or ACROS unless otherwise noted. UDG, UDG inhibitor (UGI), *Afu* UDG, 10x UDG reaction buffer (200 mM Tris-HCl, 10 mM EDTA, 10 mM dithiothreitol), 10x ThermoPol II (Mg-free) reaction buffer (200 mM Tris-HCl, 100 mM (NH<sub>4</sub>)<sub>2</sub>SO<sub>4</sub>, 100 mM KCl, 1 % Triton X-100) were purchased from New England Biolabs.

**Oligodeoxynucleotide synthesis.** 5'-DMT 3'-cyanoethyl  $\alpha$ -pyrene phosphoramidite (**Y**) was prepared according to published methods.<sup>[1, 2]</sup> Probe **1-9** and reference compound **10** was synthesized on a Applied Biosystems 394 DNA/RNA synthesizer, using 3'-phosphate CPG column on 1  $\mu$ mol scale with DMT-off method. Coupling of each monomer used standard 3' to 5' cyanoethyl phosphoramidite chemistry with extended coupling time (999 s). Oligomers were deprotected by saturated NH<sub>4</sub>OH for 17 hour at 55 °C. Purification was carried out utilizing a Shimadzu Series HPLC with an Alltech C5 column with acetonitrile and TEAA buffer (100 mM, pH 7.4) as eluents. The identities were confirmed by MALDI-TOF-MASS. The concentrations of oligonucleotides were determined by pyrene UV absorbance at 342 nm ( $\epsilon = 47000 \text{ cm}^{-1} \text{ M}^{-1}$ ).<sup>[3]</sup>

**Quantum yield measurements.** Fluorescence studies were performed on a Jobin Yvon-Spex Fluorolog 3 spectrophotometer equipped with a thermostat accurate to 0.1 °C. The emission spectra were obtained by exciting the samples at 340 nm and scanning the emission from 350 to 500 nm with a step of 1 nm. Quinine sulfate was used as a fluorescence quantum yield standard.<sup>[4]</sup> Quenching efficiency was determined by dividing the fluorescence intensity of the each probe by the fluorescence intensity of the reference compound **10**, multiplying the result by 100 and then subtracting the result from 100.

**In vitro enzymatic fluorescence assay.** The probes were dissolved in water to prepare a stock solution of 10  $\mu$ M. The samples were incubated at 37.0 °C for UDG in 1x UDG reaction buffer and at 65.0 °C for *Afu* UDG in 1x ThermoPol II (Mg-free) reaction buffer. When the fluorescence intensity was stable, the UDG or *Afu* UDG was added to the solution. After mixing rapidly, the fluorescence spectra or the time curves of the fluorescence intensity of solutions were recorded.

**Bacterial culture and imaging.** An E. coli strain lacking the UDG enzyme (BW310DE3) was transformed with pET28a-afung plasmid using standard procedures (Sambrook J, Maniatis T,

1989, Molecular Cloning, A Laboratory Manual, Second Ed., Cold Spring Harbor Press, Cold Spring Harbor). Growth medium (Luria-Bertani) and glass containers were sterilized by autoclaving at 120 °C for 20 min. *E. coli* BW310DE3 (pET28a-afung) inoculated into LB medium containing 34 mg/ml kanamycin (LB-kan) and was grown 12-16 hours at 37 °C as a starter culture. The starter culture was diluted 1:100 with fresh LB-kan medium and was grown at 37 °C until OD<sub>600</sub> of the culture reached 0.6. Isopropyl-1-thio-β-D-galactopyranoside (IPTG) was then added to a final concentration of 1 mM, and the culture was incubated for an additional 5 h at 30 °C. Aliquots (10 – 20 mL) were centrifuged and the supernatant decanted. Pellets were washed with water and resuspended in 1x ThermoPol II (Mg-free) reaction buffer (20 mM Tris-HCl, 10 mM(NH<sub>4</sub>)<sub>2</sub>SO<sub>4</sub>, 10 mM KCl, 0.1% Triton X-100 ) (+ IPTG bacteria). The cells without addition of IPTG was also harvested and resuspended in 1x ThermoPol II (Mg-free) reaction buffer (- IPTG bacteria). *Escherichia coli* (BW(310)DE3udg(-)) cells were cultured with LB medium, and harvested and resuspended in 1x ThermoPol II (Mg-free) reaction buffer. These bacteria suspensions were used as a stock solution. Probes were added (final concentration: [probe] = 5 μM, [bacteria, OD<sub>600</sub>] = 0.31) and the samples were incubated at 20 °C or 65 °C without shaking and protected from light. Aliquots of incubated bacteria were spotted on cover slides without washing or fixation. Samples were imaged under a Nikon Eclipse 80i epifluorescence microscope equipped with 100X objective. Images were captured using a QIclick digital CCD camera and QCapture Pro 7 Imaging software with excitation 330–380 nm and emission > 420 nm.

## References

- (1) R. X.-F. Ren, N. C. Chaudhuri, P. L. Paris, S. R. IV and E. T. Kool, *J. Am. Chem. Soc.*, **1996**, *118*, 7671-7678.
- (2) J. Gao, S. Watanabe and E. T. Kool, *J. Am. Chem. Soc.*, **2004**, *126*, 12748-12749.
- (3) J. Gao, C. Strassler, D. Tahmassebi and E. T. Kool, *J. Am. Chem. Soc.*, **2002**, *124*, 11590-11591
- (4) J. R. Lakowicz, Principles of Fluorescence Spectroscopy, 3<sup>rd</sup> ed., Springer, New York, **2006**.

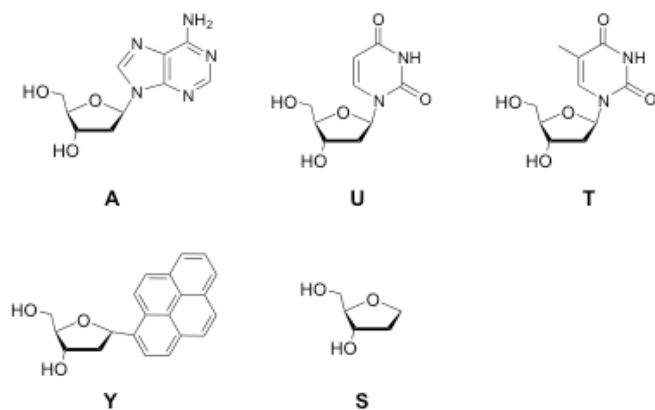

**Figure S1.** Natural and non-natural monomers employed as components of the probe sequences.

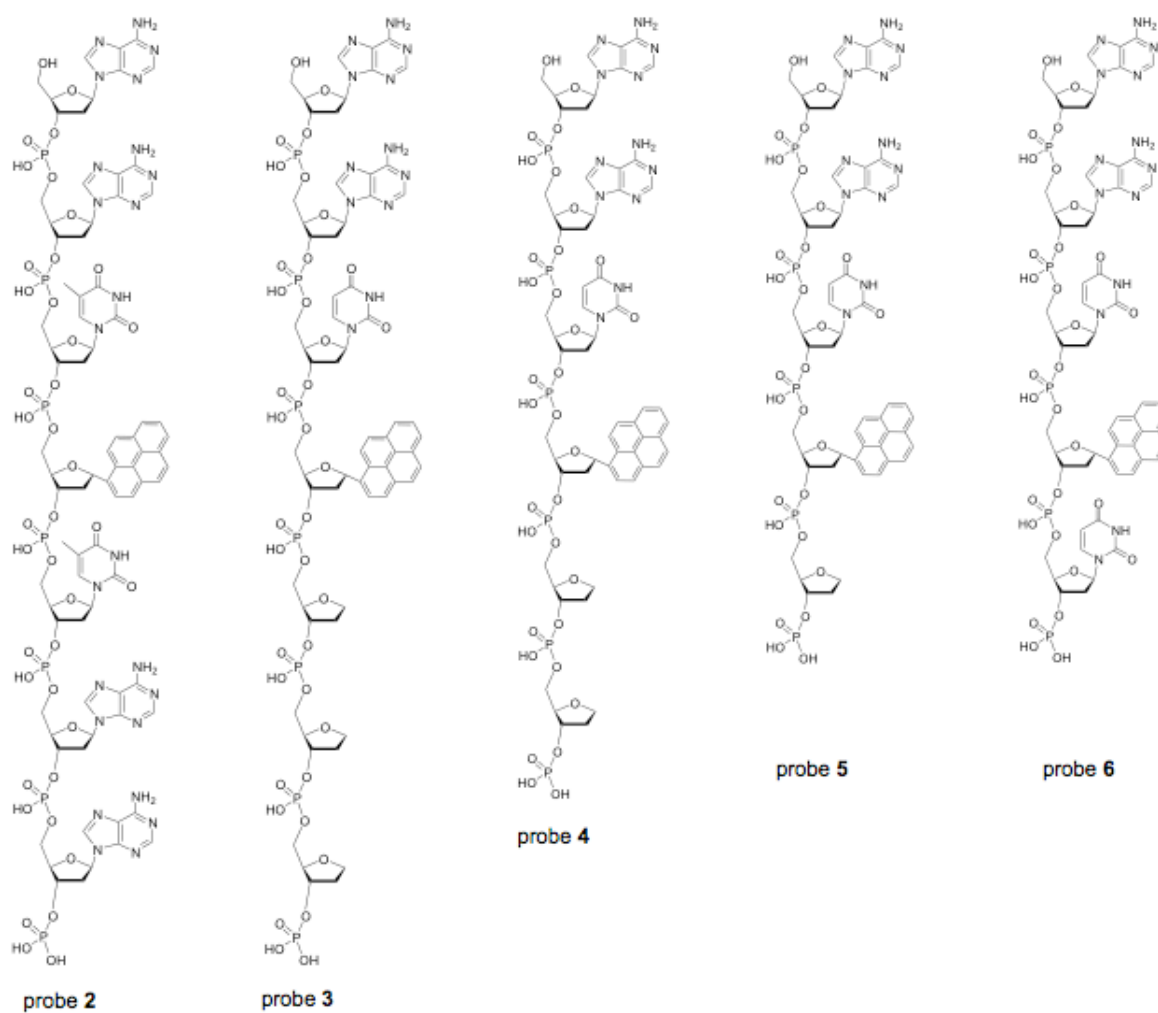

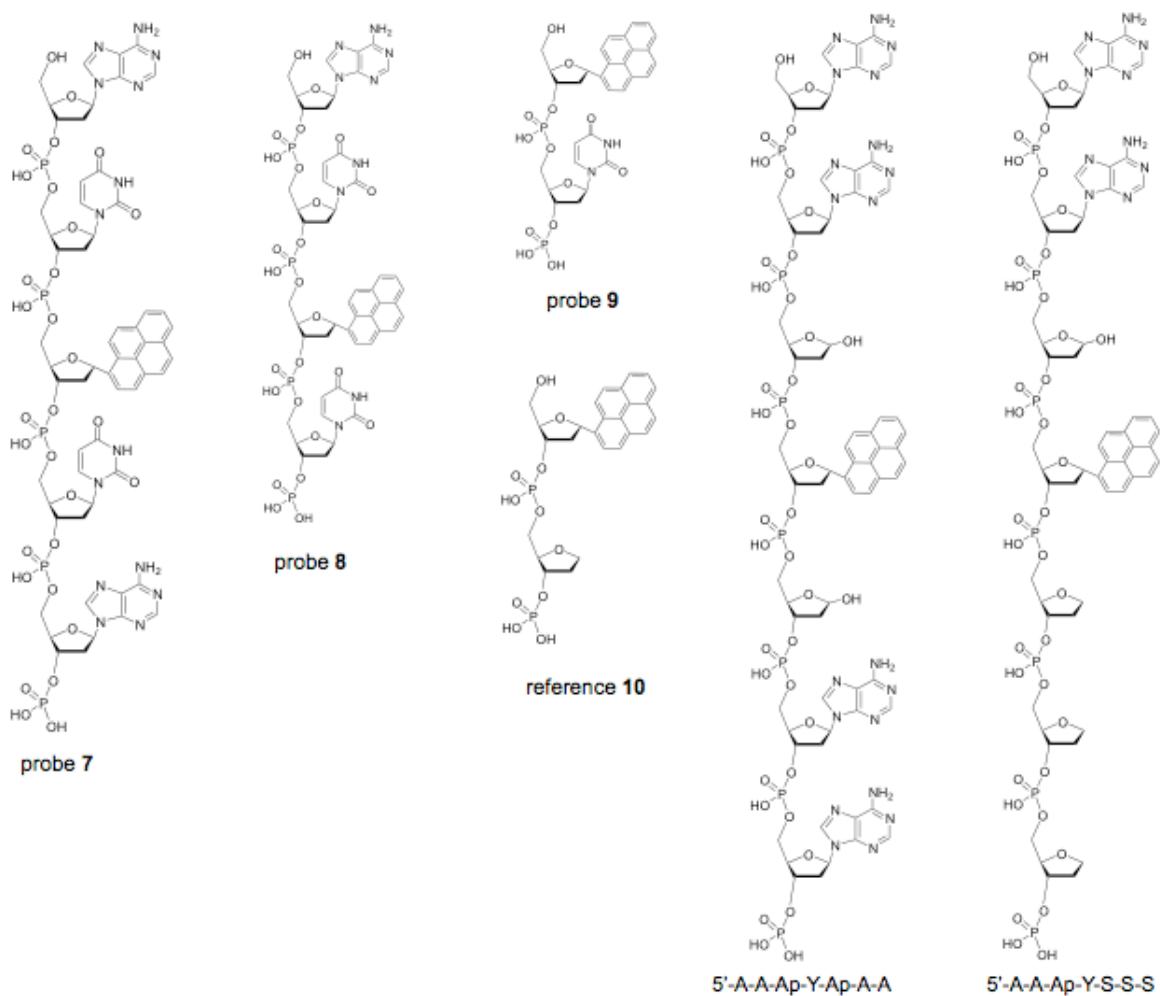

**Figure S2.** Chemical Structure of probes **1-9**, reference **10**, as well as enzymatic reaction products 5'-A-A-Ap-Y-Ap-A-A and 5'-A-A-Ap-Y-S-S-S.

**Table S1.** MALDI-TOF mass characterization of probes **1-9** and reference **10**.

| Oligomer     | Sequence         | Calc'd Mass | Found  |
|--------------|------------------|-------------|--------|
| probe 1      | 5'-A-A-U-Y-U-A-A | 2231.5      | 2231.6 |
| probe 2      | 5'-A-A-T-Y-T-A-A | 2258.9      | 2258.9 |
| probe 3      | 5'-A-A-U-Y-S-S-S | 1855.2      | 1854.2 |
| probe 4      | 5'-A-A-U-Y-S-S   | 1675.1      | 1675.6 |
| probe 5      | 5'-A-A-U-Y-S     | 1495.0      | 1495.5 |
| probe 6      | 5'-A-A-U-Y-U     | 1605.1      | 1606.9 |
| probe 7      | 5'-A-U-Y-U-A     | 1605.1      | 1606.7 |
| probe 8      | 5'-A-U-Y-U       | 1292.0      | 1291.2 |
| probe 9      | 5'-Y-U           | 688.5       | 688.3  |
| reference 10 | 5'-Y-S           | 578.4       | 578.7  |

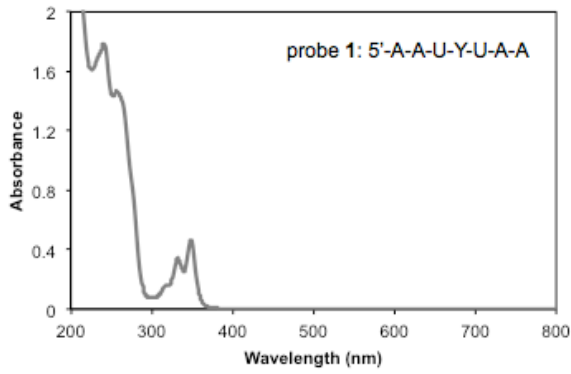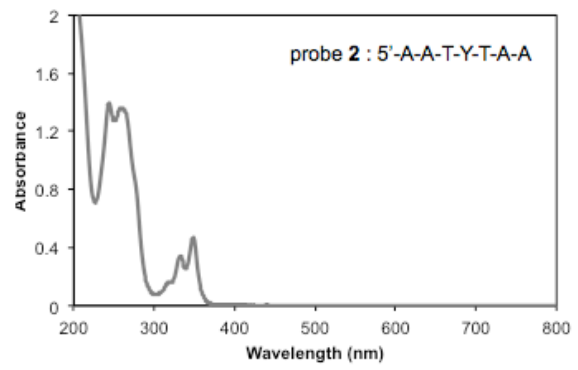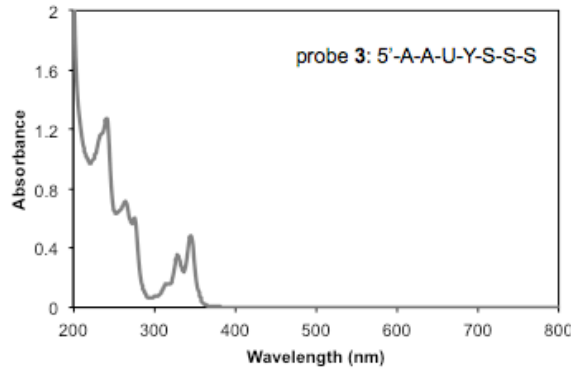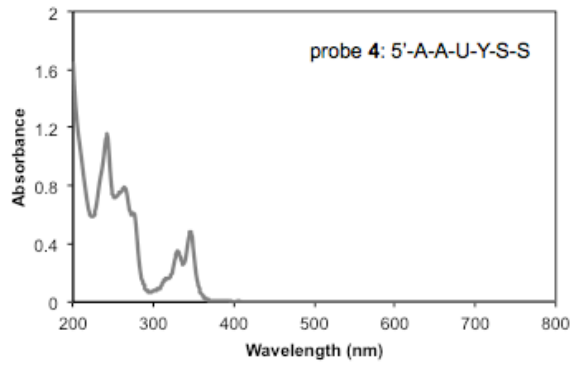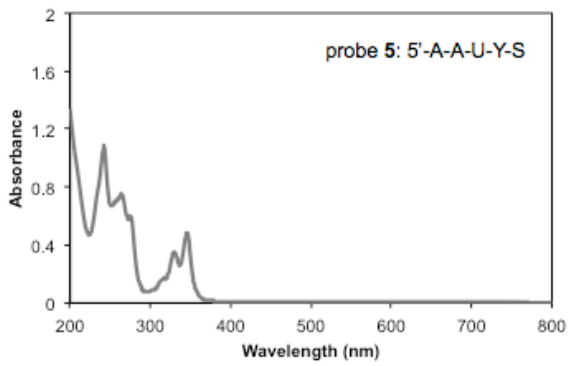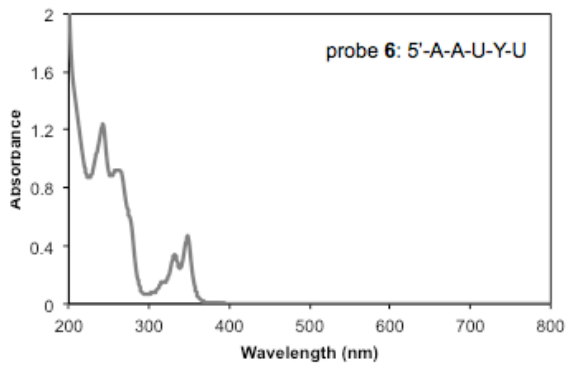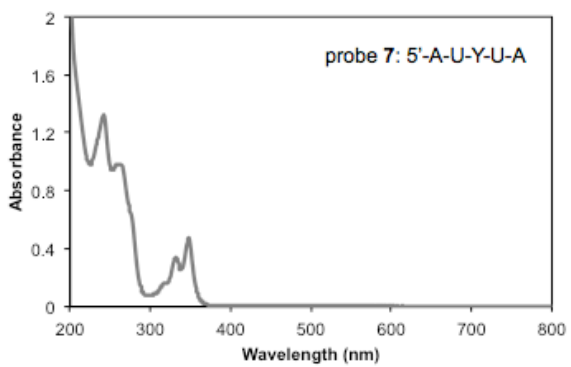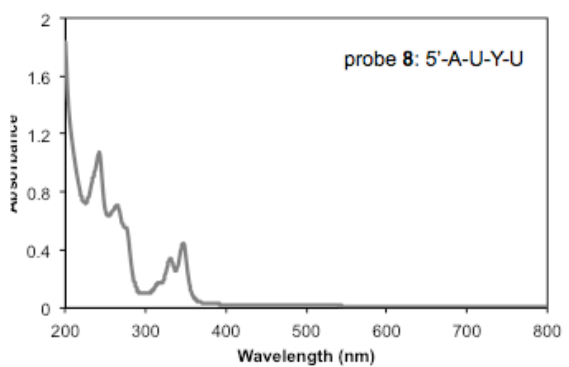

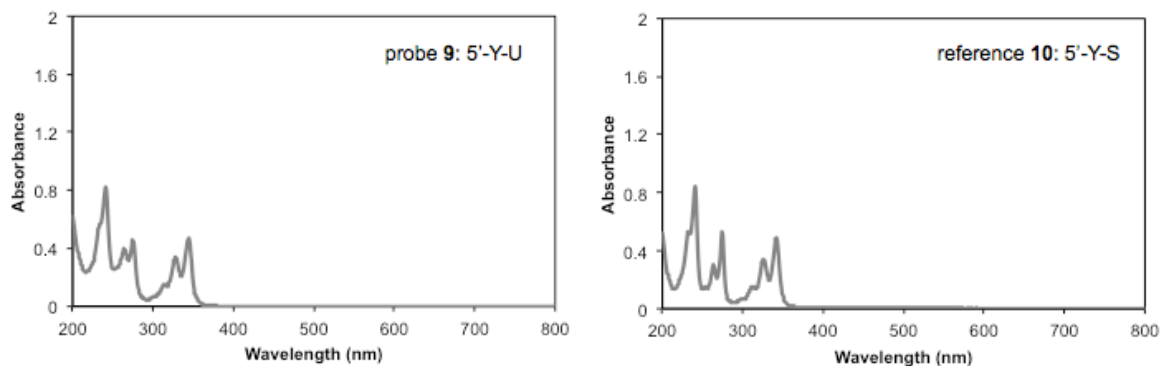

**Figure S3.** UV-vis absorption spectra of probes **1-9** and reference **10**. [probe] = 10  $\mu$ M, in water

**Table S2.** Quantum yields (QY) and quenching effect of **1-9** and reference **10** in water.

| Compound     | Sequence         | QY    | Quench Effect |
|--------------|------------------|-------|---------------|
| probe 1      | 5'-A-A-U-Y-U-A-A | 0.004 | 98.7 %        |
| probe 2      | 5'-A-A-T-Y-T-A-A | 0.006 | 98.0 %        |
| probe 3      | 5'-A-A-U-Y-S-S-S | 0.030 | 90.3 %        |
| probe 4      | 5'-A-A-U-Y-S-S   | 0.032 | 89.7 %        |
| probe 5      | 5'-A-A-U-Y-S     | 0.032 | 89.7 %        |
| probe 6      | 5'-A-A-U-Y-U     | 0.004 | 98.7 %        |
| probe 7      | 5'-A-U-Y-U-A     | 0.004 | 98.7 %        |
| probe 8      | 5'-A-U-Y-U       | 0.005 | 98.4 %        |
| probe 9      | 5'-Y-U           | 0.013 | 95.8 %        |
| reference 10 | 5'-Y-S           | 0.310 | ---           |

**Table S3.** Apparent relative rates of enzymatic cleavage ( $k_{app,rel}$ ) from initial velocities of probes. [probe] = 400 nM; [UDG] = 1 unit/mL at 37  $^{\circ}$ C.

| Compound | Sequence         | $k_{app}$ |
|----------|------------------|-----------|
| probe 1  | 5'-A-A-U-Y-U-A-A | 258       |
| probe 3  | 5'-A-A-U-Y-S-S-S | 480       |
| probe 4  | 5'-A-A-U-Y-S-S   | 536       |
| probe 5  | 5'-A-A-U-Y-S     | 294       |
| probe 6  | 5'-A-A-U-Y-U     | 2         |
| probe 7  | 5'-A-U-Y-U-A     | 33        |
| probe 8  | 5'-A-U-Y-U       | 1         |

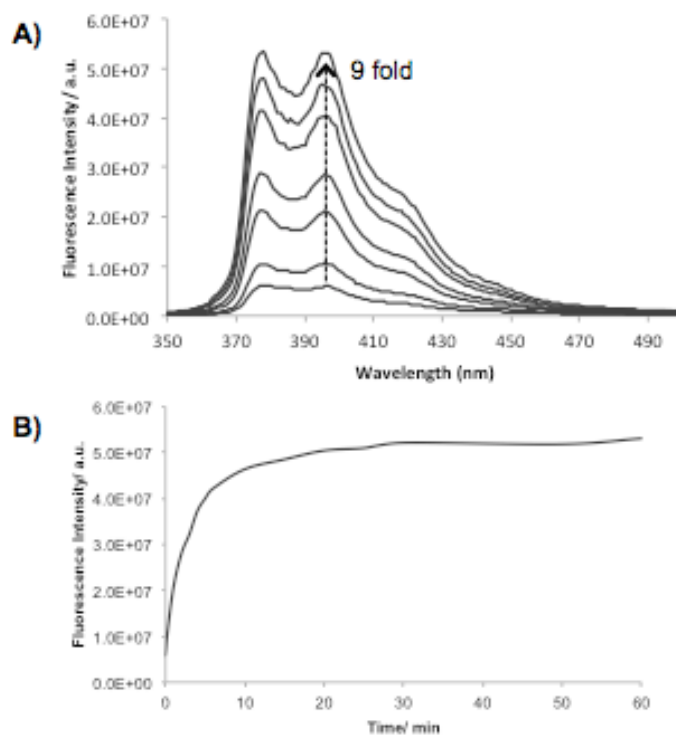

**Figure S4.** In vitro enzymatic assay of probe **5** incubated with *E. coli* UDG. (A) Fluorescence spectra over a 60-min timecourse (excitation 340 nm). (B) Increase in emission over time at 395 nm. [probe **5**] = 400 nM; [UDG] = 1 unit/mL at pH 8.0, 37 °C.

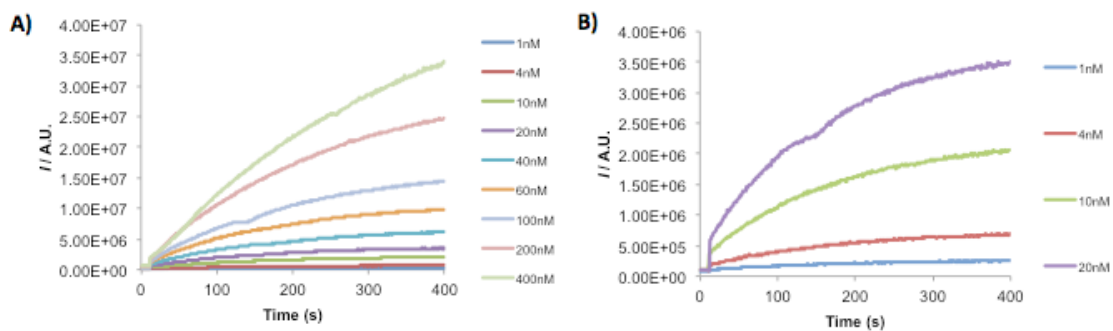

**Figure S5.** In vitro enzymatic assay of probe **1** incubated with *E. coli* UDG. (A, B) Fluorescence spectra probe **1** (1 to 400 nM) with UDG 1 unit/mL at pH 8.0, 37 °C



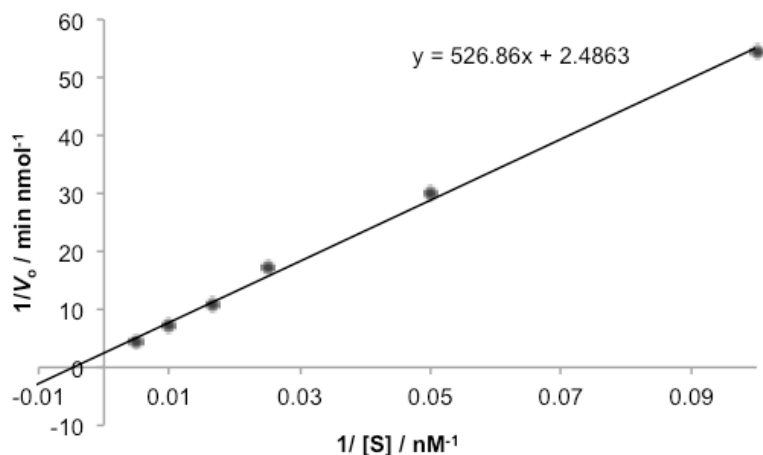

**Figure S6.** Lineweaver–Burk plot of reciprocals of initial rates ( $V_o$ ) versus probe **1** concentration for the determination of kinetic parameters  $K_M$  and  $V_{max}$  of UDG assay. From the linear fit of the data, we determined  $K_M = 212$  nM,  $V_{max} = 0.40$  nmol min<sup>-1</sup>,  $k_{cat} = 2062$  min<sup>-1</sup>,  $k_{cat}/K_M = 9.7$  nM<sup>-1</sup> min<sup>-1</sup>,  $y = 528.86x + 2.4863$ . Reaction conditions: [probe **1**] = 10, 20, 40, 60, 100, 200 nM, [UDG] = 1 unit/mL at 37 °C.

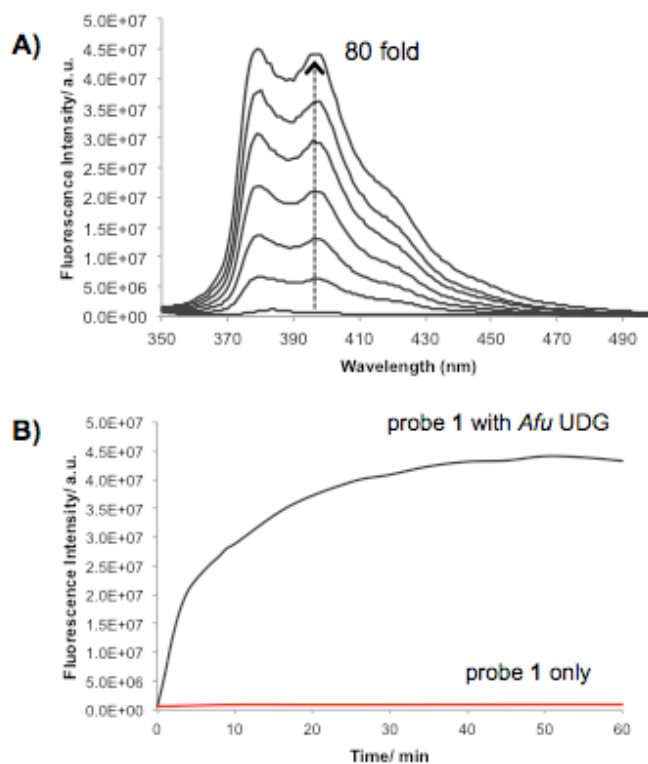

**Figure S7.** In vitro enzymatic assay of probe **1** incubated with *E. coli* *Afu* UDG. (A) Fluorescence spectra over a 60-min timecourse (excitation 340 nm). (B) Increase in emission over time at 395 nm. [probe **1**] = 400 nM; [*Afu* UDG] = 1 unit/mL at 65 °C (pH 7.4 @ 25 °C).

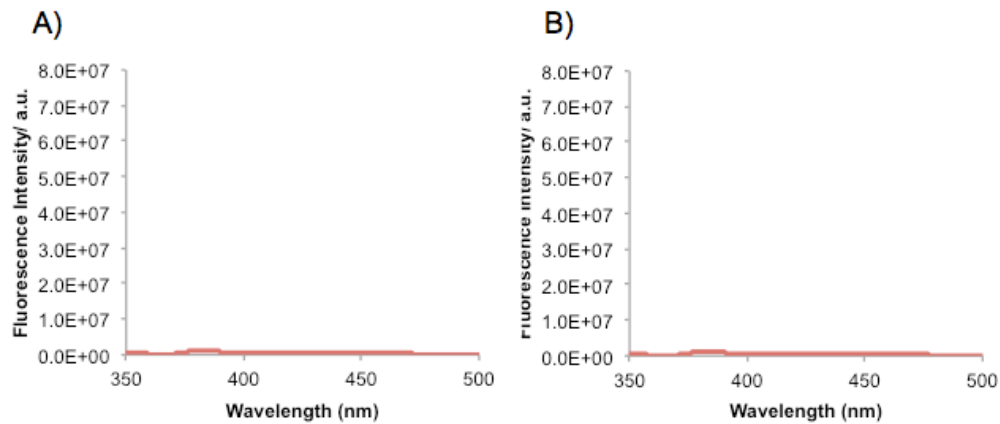

**Figure S8.** (A,B) Control experiments: Spectra of bacterial solutions diluted tenfold (excitation 340 nm). (A) Probe **1** with bacteria expressing *Afu* UDG (+ IPTG), incubated with probe for 1 h (20 °C) showing low signal at short times and low temperature; (B) Control probe **2** with bacteria under the same conditions.

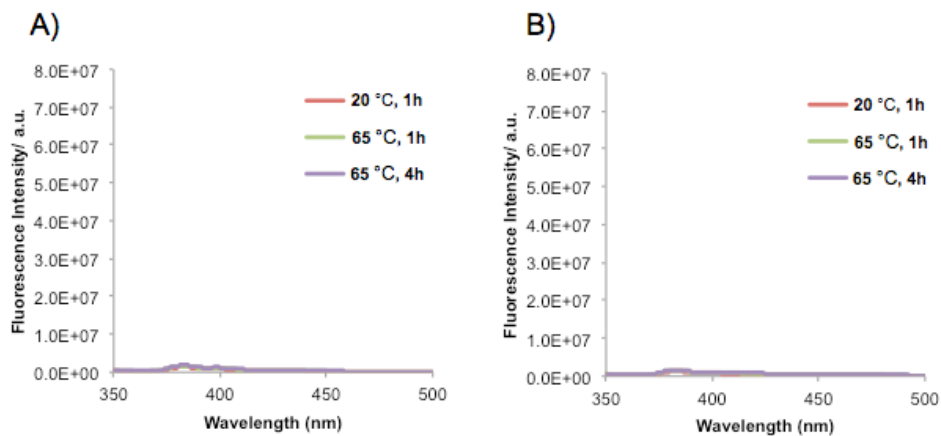

**Figure S9.** (A,B) Control experiments: Spectra of bacterial solutions diluted tenfold (excitation 340 nm). (A) Probe **1** with control *Ec* with UDG gene deleted, incubated with probe for 1- 4 h (20 or 65 °C); (B) Control probe **2** with same bacteria under the same conditions.
